# Supplementary material
Source: PubMed Central journal article supplement (PMC7096320)
Supplement: 10-1055-s-0040-1705107-s190230ra.pdf [file 10-1055-s-0040-1705107-s190230ra.pdf]

**Supplementary Appendix A** Manual chart review for patients meeting IPSO severe sepsis criteria but no BPA fired

| ID | Reviewer-1 sepsis | Reason for meeting sepsis definition                                 | Reviewer-2 sepsis | Reviewer-3 sepsis (if applicable) | Reason for determination                                                                                                |
|----|-------------------|----------------------------------------------------------------------|-------------------|-----------------------------------|-------------------------------------------------------------------------------------------------------------------------|
| 1  | Yes               | Sepsis huddle completed, on sepsis algorithm                         | Yes               | NA                                |                                                                                                                         |
| 2  | Yes               | Sepsis huddle completed, on sepsis algorithm                         | Yes               | NA                                |                                                                                                                         |
| 3  | No                | Did not meet sepsis definition (influenza only)                      | No                | NA                                |                                                                                                                         |
| 4  | No                | Did not meet sepsis definition (respiratory viral infection)         | No                | NA                                |                                                                                                                         |
| 5  | Yes               | Sepsis huddle completed, on sepsis algorithm                         | Yes               | NA                                |                                                                                                                         |
| 6  | Yes               | Sepsis huddle completed, on sepsis algorithm                         | Yes               | NA                                |                                                                                                                         |
| 7  | Yes               | Diagnoses of septic shock                                            | Yes               | NA                                |                                                                                                                         |
| 8  | No                | Sepsis huddle completed, on sepsis algorithm                         | Yes               | Yes                               | Sepsis huddle completed and on sepsis algorithm. Difficult to find documentation                                        |
| 9  | Yes               | Sepsis huddle completed, on sepsis algorithm                         | Yes               | NA                                |                                                                                                                         |
| 10 | Yes               | Sepsis huddle completed, on sepsis algorithm                         | Yes               | NA                                |                                                                                                                         |
| 11 | No                | Did not meet sepsis definition                                       | No                | NA                                |                                                                                                                         |
| 12 | No                | Did not meet sepsis definition                                       | Yes               | No                                | Patient had clear reasons for meeting IPSO criteria that were not sepsis (diagnosis hemophagocytic lymphohistiocytosis) |
| 13 | Yes               | Sepsis huddle completed, on sepsis algorithm                         | Yes               | NA                                |                                                                                                                         |
| 14 | Yes               | Sepsis huddle completed, on sepsis algorithm                         | Yes               | NA                                |                                                                                                                         |
| 15 | No                | Did not meet sepsis definition (hemorrhage)                          | No                | NA                                |                                                                                                                         |
| 16 | No                | Did not meet sepsis definition                                       | Yes               | No                                | Patient had clear reasons for meeting IPSO criteria that were not sepsis (diagnosis dehydration)                        |
| 17 | No                | Did not meet sepsis definition (heart failure)                       | No                | NA                                |                                                                                                                         |
| 18 | No                | Did not meet sepsis definition (status epilepticus on high sedation) | No                | NA                                |                                                                                                                         |
| 19 | No                | Did not meet sepsis definition (liver failure)                       | No                | NA                                |                                                                                                                         |
| 20 | Yes               | Diagnoses of septic shock                                            | Yes               | NA                                |                                                                                                                         |
| 21 | Yes               | Diagnoses of septic shock                                            | Yes               | NA                                |                                                                                                                         |
| 22 | No                | Did not meet sepsis definition (foreign body)                        | No                | NA                                |                                                                                                                         |
| 23 | No                | Did not meet sepsis definition (heart failure)                       | No                | NA                                |                                                                                                                         |
| 24 | Yes               | Sepsis huddle completed, on sepsis algorithm                         | No                | Yes                               | Sepsis huddle was completed and started on sepsis algorithm just difficult to find documentation                        |
| 25 | No                | Did not meet sepsis definition (status epilepticus on high sedation) | No                | NA                                |                                                                                                                         |
| 26 | No                | Did not meet sepsis definition (respiratory viral infection)         | No                | NA                                |                                                                                                                         |
| 27 | Yes               | Sepsis huddle completed, on sepsis algorithm                         | Yes               | NA                                |                                                                                                                         |
| 28 | No                | Did not meet sepsis definition (heart failure)                       | No                | NA                                |                                                                                                                         |
| 29 | Yes               | Diagnoses of septic shock                                            | Yes               | NA                                |                                                                                                                         |
| 30 | Yes               | Diagnoses of septic shock                                            | Yes               | NA                                |                                                                                                                         |
| 31 | No                | Did not meet sepsis definition (vasoplegia)                          | Yes               | No                                | Patient had clear reasons for meeting IPSO criteria that were not sepsis (diagnosis heart failure)                      |
| 32 | No                | Did not meet sepsis definition (heart failure)                       | No                | NA                                |                                                                                                                         |

Abbreviations: BPA, best practice alert; IPSO, improving pediatric sepsis outcomes; NA, not available.

**Supplementary Appendix B** 2 × 2 tables

|                         | Sepsis positive                            | Sepsis negative                            |
|-------------------------|--------------------------------------------|--------------------------------------------|
| CDS intervention (BPA)+ | 392                                        | 460                                        |
| CDS intervention (BPA)– | 32                                         | 9,921                                      |
|                         | IPSO severe sepsis positive                | IPSO severe sepsis negative                |
| CDS intervention (BPA)+ | 44                                         | 808                                        |
| CDS intervention (BPA)– | 32                                         | 9,921                                      |
|                         | IPSO severe sepsis positive + chart review | IPSO severe sepsis negative + chart review |
| CDS intervention (BPA)+ | 44                                         | 808                                        |
| CDS intervention (BPA)– | 16                                         | 9,937                                      |

Abbreviations: BPA, best practice alert; CDS, clinical decision support PICU, pediatric intensive care unit.
